# Supplementary material for: Dynamic miRNA Landscape Links Mammary Gland Development to the Regulation of Milk Protein Expression in Mice
Source: MDPI journal article supplement (doi:10.3390/ani12060727), 2022-03-14
Supplement: s1 [file s1]

**Supplementary Table S1** Primers used in the present study

| Name                                      | Sequence (5'- 3')                                  |
|-------------------------------------------|----------------------------------------------------|
| <i>Primers designed to quantify mRNA</i>  |                                                    |
| $\alpha$ -casein-F                        | TGCAGCATCTGAGGAACAAG                               |
| $\alpha$ -casein-R                        | TCTGAAGCTGTTCCAGGGTG                               |
| $\beta$ -casein-F                         | GGTGAATCTCATGGGACAGC                               |
| $\beta$ -casein-R                         | CACAGGGGGTTGAGCAATAG                               |
| Wap-F                                     | GGCTTCTGCCCTTGGAATCT                               |
| Wap-R                                     | TGAGACTGCATACCTGGCAC                               |
| $\beta$ -actin -F                         | TGAGCTGCGTTTTACACCCT                               |
| $\beta$ -actin -R                         | GCCTTCACCGTTCCAGTTTTT                              |
| <i>Primers designed to quantify miRNA</i> |                                                    |
| mmu-miR-212-5p-RT                         | GTCGTATCCAGTGCAGGGTCCGAGGTATTCGCACTGGATACGACAGTAAG |
| mmu-miR-212-5p-F                          | ATGGGACCTTGGCTCTAGACT                              |
| mmu-miR-212-5p-R                          | CAGTGCAGGGTCCGAGGTAT                               |
| mmu-miR-200b-3p-RT                        | GTCGTATCCAGTGCAGGGTCCGAGGTATTCGCACTGGATACGACTCATCA |
| mmu-miR-200b-3p-F                         | ACGGGCTAATACTGCCTGGTAA                             |
| mmu-miR-200b-3p-R                         | CAGTGCAGGGTCCGAGGTAT                               |
| mmu-let-7g-5p-RT                          | GTCGTATCCAGTGCAGGGTCCGAGGTATTCGCACTGGATACGACAACTGT |
| mmu-let-7g-5p-F                           | ACGGGCTGAGGTAGTAGTTTGT                             |
| mmu-let-7g-5p-R                           | CAGTGCAGGGTCCGAGGTAT                               |
| mmu-miR-151-5p-RT                         | GTCGTATCCAGTGCAGGGTCCGAGGTATTCGCACTGGATACGACACTAGA |
| mmu-miR-151-5p-F                          | CAAATTCGAGGAGCTCACAGT                              |
| mmu-miR-151-5p-R                          | CAGTGCAGGGTCCGAGGTAT                               |
| mmu-miR-10a-5p-RT                         | GTCGTATCCAGTGCAGGGTCCGAGGTATTCGCACTGGATACGACCACAAA |
| mmu-miR-10a-5p-F                          | GGGTACCCTGTAGATCCGAAT                              |
| mmu-miR-10a-5p-R                          | CAGTGCAGGGTCCGAGGTAT                               |
| mmu-miR-100-5p-RT                         | GTCGTATCCAGTGCAGGGTCCGAGGTATTCGCACTGGATACGACCACAAG |

|                        |                                                    |
|------------------------|----------------------------------------------------|
| mmu-miR-100-5p-F       | GGAACCCGTAGATCCGAACT                               |
| mmu-miR-100-5p-R       | CAGTGCAGGGTCCGAGGTAT                               |
| mmu-miR-700-5p-RT      | GTCGTATCCAGTGCAGGGTCCGAGGTATTCGCACTGGATACGACGCAAGC |
| mmu-miR-700-5p-F       | ACCCTAAGGCTCCTTCCTGTG                              |
| mmu-miR-700-5p-R       | CAGTGCAGGGTCCGAGGTAT                               |
| novel-mmu-miR424-5p-RT | GTCGTATCCAGTGCAGGGTCCGAGGTATTCGCACTGGATACGACCTCCTC |
| novel-mmu-miR424-5p-F  | GCAAATGAGGAGGAGGAGGA                               |
| novel-mmu-miR424-5p-R  | CAGTGCAGGGTCCGAGGTAT                               |
| mmu-U6-RT              | GGGCCATGCTAATCTTCTCTG                              |
| mmu-U6-F               | TCGCTTCGGCAGCACATA                                 |
| mmu-U6-R               | GGGCCATGCTAATCTTCTCTG                              |

---
